# Supplementary material for: The Spore Differentiation Pathway in the Enteric Pathogen Clostridium difficile
Source: PubMed Central journal article supplement (PMC3789829; doi:10.1371/journal.pgen.1003782), 2013-10-03
Supplement: pgen.1003782.s010.pdf [file pgen.1003782.s010.pdf]

**Table S2 - Bacterial strains used in this study.**

| Strain                        | Relevant Properties                                | Origin/<br>Reference |
|-------------------------------|----------------------------------------------------|----------------------|
| <b><i>E. coli</i></b>         |                                                    |                      |
| Dh5 $\alpha$                  |                                                    | Invitrogen           |
| HB101 (RP4)                   |                                                    | Laboratory stock     |
| AHCD018                       | HB101 (RP4)/ pMTL007::Cdi- <i>sigE</i> -453s       | This work            |
| AHCD019                       | HB101 (RP4)/ pMTL007::Cdi- <i>sigF</i> -459s       | "                    |
| AHCD020                       | HB101 (RP4)/ pMTL007::Cdi- <i>sigG</i> -546s       | "                    |
| AHCD021                       | HB101 (RP4)/ pMTL007::Cdi- <i>sigK</i> -102s       | "                    |
| AHCD072                       | HB101 (RP4)/ pFT32                                 | "                    |
| AHCD073                       | HB101 (RP4)/ pFT38                                 | "                    |
| AHCD074                       | HB101 (RP4)/ pFT39                                 | "                    |
| AHCD075                       | HB101 (RP4)/ pFT40                                 | "                    |
| AHCD076                       | HB101 (RP4)/ pMTL84121                             | "                    |
| AHCD077                       | HB101 (RP4)/ pFT42                                 | "                    |
| AHCD095                       | HB101 (RP4)/ pFT46                                 | "                    |
| AHCD108                       | HB101 (RP4)/ pFT49                                 | "                    |
| AHCD109                       | HB101 (RP4)/ pFT50                                 | "                    |
| AHCD110                       | HB101 (RP4)/ pFT51                                 | "                    |
| AHCD112                       | HB101 (RP4)/ pFT48                                 | "                    |
| AHCD114                       | HB101 (RP4)/ pFT53                                 | "                    |
| AHCD115                       | HB101 (RP4)/ pFT54                                 | "                    |
| AHCD116                       | HB101 (RP4)/ pFT55                                 | "                    |
| AHCD131                       | HB101 (RP4)/ pFT47                                 | "                    |
| AHCD142                       | HB101 (RP4)/ pFT64                                 | "                    |
| AHCD149                       | HB101 (RP4)/ pFT63                                 | "                    |
| AHCD150                       | HB101 (RP4)/ pFT69                                 | "                    |
| AHCD151                       | HB101 (RP4)/ pFT70                                 | "                    |
| <b><i>B. subtilis</i></b>     |                                                    |                      |
| MB24                          | <i>trpC2 metC3</i> /Spo <sup>+</sup>               | Laboratory strain    |
| AH10170                       | MB24 <i>tgl-cfp</i>                                | "                    |
| <b><i>B. cereus</i></b>       |                                                    |                      |
| ATCC4342                      | <i>B. cereus</i> wild type strain                  | [93]                 |
| <b><i>C. difficile</i></b>    |                                                    |                      |
| 630 $\Delta$ <i>erm</i>       | <i>C. difficile</i> 630 $\Delta$ <i>erm</i>        | [85]                 |
| 630 $\Delta$ <i>erm spo0A</i> | 630 $\Delta$ <i>erm spo0A</i> ::intron <i>ermB</i> | [61]                 |
| AHCD532                       | 630 $\Delta$ <i>erm sigE</i> ::intron <i>ermB</i>  | This work            |
| AHCD533                       | 630 $\Delta$ <i>erm sigF</i> ::intron <i>ermB</i>  | "                    |
| AHCD534                       | 630 $\Delta$ <i>erm sigG</i> ::intron <i>ermB</i>  | "                    |
| AHCD535                       | 630 $\Delta$ <i>erm sigK</i> ::intron <i>ermB</i>  | "                    |
| AHCD543                       | 630 $\Delta$ <i>erm</i> containing pMTL84121       | "                    |
| AHCD544                       | AHCD533 containing pMTL84121                       | "                    |
| AHCD545                       | AHCD532 containing pMTL84121                       | "                    |
| AHCD546                       | AHCD534 containing pMTL84121                       | "                    |
| AHCD547                       | AHCD535 containing pMTL84121                       | "                    |
| AHCD548                       | AHCD533 containing pFT32                           | "                    |
| AHCD549                       | AHCD532 containing pFT39                           | "                    |
| AHCD550                       | AHCD534 containing pFT40                           | "                    |
| AHCD551                       | AHCD535 containing pFT38                           | "                    |
| AHCD577                       | AHCD535 containing pFT42                           | "                    |
| AHCD586                       | 630 $\Delta$ <i>erm</i> containing pFT46           | "                    |
| AHCD597                       | 630 $\Delta$ <i>erm</i> containing pFT49           | "                    |

|         |                                                |   |
|---------|------------------------------------------------|---|
| AHCD598 | 630 $\Delta$ <i>erm</i> containing pFT48       | “ |
| AHCD600 | 630 $\Delta$ <i>erm</i> containing pFT50       | “ |
| AHCD601 | 630 $\Delta$ <i>erm</i> containing pFT51       | “ |
| AHCD602 | 630 $\Delta$ <i>erm</i> containing pFT53       | “ |
| AHCD603 | 630 $\Delta$ <i>erm</i> containing pFT54       | “ |
| AHCD604 | 630 $\Delta$ <i>erm</i> containing pFT55       | “ |
| AHCD610 | AHCD533 containing pFT53                       | “ |
| AHCD611 | AHCD533 containing pFT54                       | “ |
| AHCD612 | AHCD533 containing pFT55                       | “ |
| AHCD613 | AHCD532 containing pFT53                       | “ |
| AHCD614 | AHCD532 containing pFT54                       | “ |
| AHCD615 | AHCD532 containing pFT55                       | “ |
| AHCD619 | AHCD534 containing pFT55                       | “ |
| AHCD621 | AHCD535 containing pFT55                       | “ |
| AHCD630 | AHCD533 containing pFT48                       | “ |
| AHCD631 | AHCD533 containing pFT49                       | “ |
| AHCD632 | AHCD533 containing pFT50                       | “ |
| AHCD633 | AHCD533 containing pFT51                       | “ |
| AHCD634 | AHCD532 containing pFT48                       | “ |
| AHCD635 | AHCD532 containing pFT49                       | “ |
| AHCD636 | AHCD532 containing pFT50                       | “ |
| AHCD637 | AHCD532 containing pFT51                       | “ |
| AHCD640 | AHCD534 containing pFT50                       | “ |
| AHCD641 | AHCD534 containing pFT51                       | “ |
| AHCD644 | AHCD535 containing pFT50                       | “ |
| AHCD645 | AHCD535 containing pFT51                       | “ |
| AHCD646 | 630 $\Delta$ <i>erm</i> containing pFT47       | “ |
| AHCD656 | 630 $\Delta$ <i>erm</i> containing pFT64       | “ |
| AHCD674 | AHCD534 containing pFT64                       | “ |
| AHCD675 | AHCD535 containing pFT64                       | “ |
| AHCD678 | 630 $\Delta$ <i>erm</i> containing pFT63       | “ |
| AHCD679 | AHCD534 containing pFT63                       | “ |
| AHCD680 | AHCD535 containing pFT63                       | “ |
| AHCD683 | AHCD534 containing pFT53                       | “ |
| AHCD684 | AHCD535 containing pFT53                       | “ |
| AHCD685 | AHCD534 containing pFT54                       | “ |
| AHCD686 | AHCD535 containing pFT54                       | “ |
| AHCD692 | 630 $\Delta$ <i>erm spo0A</i> containing pFT48 | “ |
| AHCD693 | 630 $\Delta$ <i>erm spo0A</i> containing pFT49 | “ |
| AHCD695 | 630 $\Delta$ <i>erm</i> containing pFT69       | “ |
| AHCD696 | AHCD533 containing pFT69                       | “ |
| AHCD697 | AHCD532 containing pFT69                       | “ |
| AHCD698 | AHCD534 containing pFT69                       | “ |
| AHCD695 | AHCD535 containing pFT69                       | “ |

---
