# Supplementary material for: The Spore Differentiation Pathway in the Enteric Pathogen Clostridium difficile
Source: PubMed Central journal article supplement (PMC3789829; doi:10.1371/journal.pgen.1003782), 2013-10-03
Supplement: pgen.1003782.s011.pdf [file pgen.1003782.s011.pdf]

**Table S3 – Oligonucleotides used in this study.**

| Primer             | Sequence (5' to 3') <sup>a</sup>                                 | Description                   |
|--------------------|------------------------------------------------------------------|-------------------------------|
| CT001              | AAAAAAGCTTATAATTATCCTTAGGAAACGAACTTGTG<br>CGCCAGATAGGGTG         | IBS-sigF-459s                 |
| CT002              | CAGATTGTACAAATGTGGTGATAACAGATAAGTCGAA<br>CTTTTAACTTACCTTTCTTTGT  | EBS1d-sigF-459s               |
| CT003              | TGAACGCAAGTTTCTAATTTTCGATTTTTCTCGATAGA<br>GGAAAGTGCT             | EBS2-sigF-459s                |
| CT004              | AAAAAAGCTTATAATTATCCTTAGATTTTCGTAATGGTG<br>CGCCAGATAGGGTG        | IBS-sigE-453s                 |
| CT005              | CAGATTGTACAAATGTGGTGATAACAGATAAGTCGTA<br>ATGGCTAACTTACCTTTCTTTGT | EBS1d-sigE-453s               |
| CT006              | TGAACGCAAGTTTCTAATTTTCGATTAAATCTCGATAGA<br>GGAAAGTGCT            | EBS2-sigE-453s                |
| CT007              | AAAAAAGCTTATAATTATCCTTAGATGCCATATTCGTG<br>CGCCAGATAGGGTG         | IBS-sigG-546s                 |
| CT008              | CAGATTGTACAAATGTGGTGATAACAGATAAGTCATAT<br>TCGTTAACTTACCTTTCTTTGT | EBS1d-sigG-546s               |
| CT009              | TGAACGCAAGTTTCTAATTTTCGATTGCATCTCGATAGA<br>GGAAAGTGCT            | EBS2-sigG-546s                |
| CT010              | AAAAAAGCTTATAATTATCCTTAGCAAACGATACAGTG<br>CGCCAGATAGGGTG         | IBS-sigK-102s                 |
| CT011              | CAGATTGTACAAATGTGGTGATAACAGATAAGTCGAT<br>ACATTTAACTTACCTTTCTTTGT | EBS1d-sigK-102s               |
| CT012              | TGAACGCAAGTTTCTAATTTTCGATTTTTGCTCGATAGA<br>GGAAAGTGCT            | EBS2-sigF-102s                |
| EBS                | CGAAATTAGAAACTTGCCTCAGTAAAC                                      | PCR ClosTron                  |
| ErmRAM-F           | ACGCGTTATATTGATAAAAAATAATAATAGTGGG                               | PCR <i>erm</i> intron         |
| ErmRAM-R           | ACGCGTGCGACTCATAGAATTATTTCTCCCG                                  | PCR <i>erm</i> intron         |
| pMTL007-F          | TTAAGGAGGTGTATTTTCATATGACCATGATTACG                              | Sequencing pMTL007            |
| pMTL007-R          | AGGGTATCCCAGTTAGTGTAAAGTCTTGG                                    | Sequencing pMTL007            |
| M13R               | CAG GAA ACA GCT ATG AC                                           | Sequencing pMTL84121          |
| M13F               | GTTTTCCCAGTCACGAC                                                | Sequencing pMTL84121          |
| OBD522             | ATCTGTAGGAGAACCTATGGGAAC                                         | Southern blot probe           |
| OBD523             | CACGTAATAAATATCTGGACGTAATA                                       | Southern blot probe           |
| CDsigF_257 Fw      | CTACTTATGCAGTACCAATG                                             | <i>sigF</i> 5'-intron         |
| CDsigF_616 Rev     | GACGCTCTCTTATCCAG                                                | <i>sigF</i> 3'-intron         |
| CDsigE_331 Fw      | GCAACTTATGCTTCGAGATG                                             | <i>sigE</i> 5'-intron         |
| CDsigE_625 Rev     | CCAAGCATTCCAGCAACTTC                                             | <i>sigE</i> 3'-intron         |
| CDsigG_99 Fw       | GGTGATGAAGAAGCCAGAC                                              | <i>sigG</i> 5'-intron         |
| CDsigG_700 Rev     | CATCAGCAACTTCTATCTGAG                                            | <i>sigG</i> 3'-intron         |
| CDsigK_35 Fw       | CCCCTGAAGAAGAGATTGAG                                             | <i>sigK</i> 5'-intron         |
| CDsigK_238 Rev     | GCATATGTTGCTAATCGAGTT                                            | <i>sigK</i> 3'-intron         |
| PCDsigF Fw         | GCTGCCGCCGCGACTTTATTCAGA                                         | 5'-promoter <i>sigF</i> -NotI |
| PCDsigF Rev        | GGCAACAGTTACTTCCATCAAAAATCCCCTCTT                                | 3'-promoter <i>sigF</i>       |
| CDsigF Fw          | AAGGAGGGATTTTTGATGGAAGTAACTGTTGCC                                | 5'- <i>sigF</i>               |
| CDsigF_EcoRI Rev   | GCTGAATTCACAGATATATATTC                                          | 3'- <i>sigF</i> -EcoRI        |
| PCDsigE Fw         | GCTCGGCCGCGACCATTGACAGTTGGAC                                     | 5'-promoter <i>sigE</i> -NotI |
| PDsigE Rev         | TTCTTTCAATCGTAACATGTATCCCCCTTAAAACC                              | 3'-promoter <i>sigE</i>       |
| CDsigE Fw          | GGTTTTAAGGGGGGATACATGTTACGATTGAAAGAA                             | 5'- <i>sigE</i>               |
| CDsigE_EcoRI Rev   | GCTGAATTCCTATACAAATTTTTTCAT                                      | 3'- <i>sigE</i> -EcoRI        |
| PCDsigG Fw         | GCTCGGCCGCGAGATGTATAGAAAATG                                      | 5'-promoter <i>sigG</i> -NotI |
| CDsigG_EcoRI Rev   | GCTGAATTCCTATACATATTTTCTCAT                                      | 3'- <i>sigG</i> -EcoRI        |
| PCDsigK5' Fw       | GCTCGGCCGCGCTGACTGATACTTTTG                                      | 5'-promoter <i>sigK</i> -NotI |
| CDsigK5' Rev       | CACTTTTCTTAAATCACTAGCTATAGAAATTGATGA                             | 3'-promoter <i>sigK</i>       |
| CDsigK3' Fw        | TCATCAATTTCTATAGCTAGTGATTTAAGAAAAGTG                             | 5'- <i>sigK</i>               |
| CDsigK3'_EcoRI Rev | GCTGAATTCCTAATTTCTTGAACAAG                                       | 3'- <i>sigK</i> -EcoRI        |
| SNAPtag_SacI Fw    | GCTCGAGAGCTCGGAGGAAGTACTATGG                                     | 5'-SNAPCd-SacI                |
| SNAPtag_BamHI Rev  | GCTGTTGGATCCAAGCTTTCTTACCC                                       | 3'-SNAPCd-BamHI               |
| PCDsigF-XhoI Rev   | GGAATAATTCGAGCAAAAATCCCCTCCTT                                    | 3'-promoter <i>sigF</i> -XhoI |
| PCDsigE-XhoI Rev   | CAATATACTCGAGGTATCCCCCTTAAAACC                                   | 3'-promoter <i>sigE</i> -XhoI |
| PCDsigG-XhoI Rev   | ATTAACCTCGAGATATTTTCAGTCCTCTCT                                   | 3'-promoter <i>sigG</i> -XhoI |

|                     |                                                         |                                       |
|---------------------|---------------------------------------------------------|---------------------------------------|
| PCDsigK-XhoI Rev    | AAGAGC <u>CTCGAG</u> TAGGTCACCCCCTTTTCA                 | 3'-promoter <i>sigK</i> -XhoI         |
| Pgpr-EcoRI Fw       | AAGAGCTAT <u>GAA</u> TCGGGTATTTATCACTT                  | 5'-promoter <i>gpr</i> -EcoRI         |
| Pgpr-XhoI Rev       | CATATAAACCTCGAGTATAAATTAATGCT                           | 3'-promoter <i>gpr</i> -XhoI          |
| PspolIIIAA-EcoRI Fw | TAGATGGT <u>GGA</u> ATTCCTAGGGCTTACCAAA                 | 5'-promoter <i>spolIIIAA</i> -EcoRI   |
| PspolIIIAA-XhoI Rev | GTTTATTCATCTCTTG <u>CTCGAG</u> TCCTTTG                  | 3'-promoter <i>spolIIIAA</i> -XhoI    |
| PsspA-EcoRI Fw      | AGATGAGGAG <u>AATTCGG</u> ATAAAAAGAGTTCA                | 5'-promoter <i>sspA</i> -EcoRI        |
| PsspA-XhoI Rev      | CTTCCTTCTCT <u>CGA</u> GTTTTATTTGTGTTGC                 | 3'-promoter <i>sspA</i> -XhoI         |
| SNAP-linker BamHIFw | GGTGGTGGTGGATCCGCAGCTGCTGATAAAGATTGT<br>GAAATGAAG       | 5'- <i>SNAPCd</i> -linker BamHI       |
| PcotB-EcoRI Fw      | TACCTAGA <u>AATTC</u> TAAGTGCAGCTATTAG                  | 5'-promoter <i>cotB</i> -EcoRI        |
| CotB Linker Rev     | GCTGCG <u>GATCC</u> ACCACCACCAAGCATGTTTTTATAAC<br>TCTCC | 3'- <i>cotB</i> -linker BamHI         |
| PcotE-EcoRI Fw      | CATAACT <u>GAA</u> ATTCATTAACACTAATGC                   | 5'-promoter <i>cotE</i> -EcoRI        |
| CotE Linker Rev     | GCTGCG <u>GATCC</u> ACCACCACCAAGGAATTGCCATAAA           | 3'- <i>cotE</i> -linker BamHI         |
| PcotE-XhoI Rev      | TACCTTC                                                 |                                       |
| DNApollIII-F        | CATGTAATCACCTCGAGATAAATTATCATT                          | 3'-promoter <i>cotE</i> -XhoI         |
| DNApollIII-R        | TCCATCTATTGCAGGGTGGT                                    | qRT-PCR, <i>dnaF</i> (CD1305)         |
| IMV552              | CCCAACTCTTCGCTAAGCAC                                    | "                                     |
| IMV553              | CCAGGAGCAAAAGAGGCTTTA                                   | qRT-PCR, <i>sspA</i> (CD2688)         |
| LS100               | TCCAGCCATTTGTTGTTGTTGAG                                 | "                                     |
| LS101               | CACCACCTCAATGTGGAAAA                                    | qRT-PCR, <i>spolIIIAA</i><br>(CD1192) |
| LS114               | GCTCCTGCTATCTCATTACGC                                   | "                                     |
| LS115               | TGCATTGGCTTCAAGAAAAA                                    | qRT-PCR, <i>gpr</i> (CD2470)          |
| LS143               | GCAATAACATCCACGCCTAAA                                   | "                                     |
| LS144               | CAGGCCCAAATGGTAGAAAA                                    | qRT-PCR, <i>cotE</i> (CD1433)         |
| LS144               | GAAGGCATTCCAGCATTCTC                                    | "                                     |

<sup>a</sup> Restriction sites are underlined.
